RESEARCH ARTICLE

# Urinary Proteomics Pilot Study for Biomarker Discovery and Diagnosis in Heart Failure with Reduced Ejection Fraction

Kasper Rossing<sup>1\*</sup>, Helle Skovmand Bosselmann<sup>2</sup>, Finn Gustafsson<sup>1</sup>, Zhen-Yu Zhang<sup>3</sup>, Yu-Mei Gu<sup>3</sup>, Tatiana Kuznetsova<sup>3</sup>, Esther Nkuipou-Kenfack<sup>4</sup>, Harald Mischak<sup>4,5</sup>, Jan A. Staessen<sup>3</sup>, Thomas Koeck<sup>4</sup>, Morten Schou<sup>6</sup>

**1** Department of Cardiology, Rigshospitalet, University Hospital of Copenhagen, Copenhagen, Denmark, **2** Department of Cardio-, Nephro-, and Endocrinology, North Zealand Hospital, University of Copenhagen, Copenhagen, Denmark, **3** Studies Coordinating Centre, Research Unit Hypertension and Cardiovascular Epidemiology, KU Leuven Department of Cardiovascular Sciences, University of Leuven, Leuven, Belgium, **4** Mosaiques Diagnostics and Therapeutics AG, Hanover, Germany, **5** Institute of Cardiovascular and Medical Sciences, University of Glasgow, Glasgow, United Kingdom, **6** Institute for Clinical Medicine, Herlev Hospital, Herlev, Denmark

☞ These authors contributed equally to this work.

\* [kasper.rossing@regionh.dk](mailto:kasper.rossing@regionh.dk)

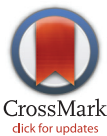

OPEN ACCESS

**Citation:** Rossing K, Bosselmann HS, Gustafsson F, Zhang Z-Y, Gu Y-M, Kuznetsova T, et al. (2016) Urinary Proteomics Pilot Study for Biomarker Discovery and Diagnosis in Heart Failure with Reduced Ejection Fraction. *PLoS ONE* 11(6): e0157167. doi:10.1371/journal.pone.0157167

**Editor:** Wen-Chih Hank Wu, Providence VA Medical Center and Brown University, UNITED STATES

**Received:** January 25, 2016

**Accepted:** May 25, 2016

**Published:** June 16, 2016

**Copyright:** © 2016 Rossing et al. This is an open access article distributed under the terms of the [Creative Commons Attribution License](https://creativecommons.org/licenses/by/4.0/), which permits unrestricted use, distribution, and reproduction in any medium, provided the original author and source are credited.

**Data Availability Statement:** Mass spectrometry amplitude data for all peptides identified in study subjects are provided as supplementary information. The clinical data of HFrEF patients cannot be uploaded as they contain patient data and are available upon request to the authors. Clinical data of the controls and LVDD patients cannot be uploaded, since the informed consent did not cover sharing the data. Any requests for using the data from the FLEMENGHO cohort in joined research projects can be addressed to Jan Staessen and will be evaluated according to the scientific value of the proposal.

## Abstract

### Background

Biomarker discovery and new insights into the pathophysiology of heart failure with reduced ejection fraction (HFrEF) may emerge from recent advances in high-throughput urinary proteomics. This could lead to improved diagnosis, risk stratification and management of HFrEF.

### Methods and Results

Urine samples were analyzed by on-line capillary electrophoresis coupled to electrospray ionization micro time-of-flight mass spectrometry (CE-MS) to generate individual urinary proteome profiles. In an initial biomarker discovery cohort, analysis of urinary proteome profiles from 33 HFrEF patients and 29 age- and sex-matched individuals without HFrEF resulted in identification of 103 peptides that were significantly differentially excreted in HFrEF. These 103 peptides were used to establish the support vector machine-based HFrEF classifier HFrEF103. In a subsequent validation cohort, HFrEF103 very accurately (area under the curve, AUC = 0.972) discriminated between HFrEF patients (N = 94, sensitivity = 93.6%) and control individuals with and without impaired renal function and hypertension (N = 552, specificity = 92.9%). Interestingly, HFrEF103 showed low sensitivity (12.6%) in individuals with diastolic left ventricular dysfunction (N = 176). The HFrEF-related peptide biomarkers mainly included fragments of fibrillar type I and III collagen but also, e.g., of fibrinogen beta and alpha-1-antitrypsin.

### Conclusion

CE-MS based urine proteome analysis served as a sensitive tool to determine a vast array of HFrEF-related urinary peptide biomarkers which might help improving our understanding and diagnosis of heart failure.

**Funding:** The funding organization (European Union; grants EU-MASCARA [HEALTH-2011.2.4.2-2] and HOMAGE [HEALTH-F7-305507 HOMAGE]) as well as the Muremester Laurits P Christensens Fund and the Kaptajnløjtnant Harald Jensen og Hustrus Fund had no role in study design, data collection and analysis, decision to publish, or preparation of the manuscript and only provided financial support. Harald Mischak, Thomas Koeck and Esther Nkuipou-Kenfack were employed by and received salary from Mosaiques Diagnostics GmbH. Being employed by Mosaiques Diagnostics GmbH did not influence study design, decision to publish or preparation of the manuscript. Urinary proteomic data collection and analysis was performed at Mosaiques Diagnostics GmbH following established standard operating procedures.

**Competing Interests:** T. Koeck and Esther Nkuipou-Kenfack are employed by Mosaiques-Diagnostics GmbH and H. Mischak is the CEO of Mosaiques-Diagnostics GmbH. Being employed by Mosaiques Diagnostics GmbH did not influence study design, decision to publish or preparation of the manuscript. Urinary proteomic data collection and analysis was performed at Mosaiques Diagnostics GmbH following established standard operating procedures. None of the other authors declared a conflict of interest.

**Abbreviations:** HFrEF, heart failure with reduced ejection fraction; CE-MS, capillary electrophoresis on-line coupled to electrospray ionization micro time-of-flight mass spectrometry; UPA, urine proteome analysis; AUC, area under the ROC curve; ESI, electrospray ionization; LVDD, preclinical left ventricular diastolic dysfunction; HF, heart failure; LVEF, left ventricular ejection fraction; CKD, chronic kidney disease; NYHA, New York Heart Association; eGFR, estimated glomerular filtration rate; SVM, support vector machine; ROC, receiver operating characteristic; CI, confidence interval; ECM, extracellular matrix; BNP, B-type natriuretic peptide.

## Introduction

Heart failure is a complex clinical syndrome characterized by impaired ventricular filling and/or ejection of blood resulting in the disability of the heart to pump a sufficient amount of blood to meet the metabolic demands of the body. Heart failure with reduced ejection fraction (HFrEF; left ventricular ejection fraction < 45%) is a potential end-stage of various cardiac diseases and represents an enormous public health and socioeconomic burden [1]. Different aetiologies may lead to the HFrEF phenotype including myocardial ischemia, hypertension, diabetes, valvular heart disease, arrhythmias and inherited cardiomyopathy. However, in the clinical setting it is often difficult to clearly identify all contributing factors. Many of the currently used biomarkers only depict part of the pathology [2]. Diagnosis, prognostication and follow-up of HFrEF patients based on currently utilized clinical, laboratory and imaging markers in the everyday practice is therefore often complex [3,4]. A new multi-biomarker-based HFrEF classifier that identifies distinct HFrEF-related molecular phenotypic expressions may provide additional (differential) diagnostic and prognostic value and prove beneficial in guiding therapy and identify new targets of treatment. It may especially help to identify and stratify asymptomatic individuals at an early stage of cardiac structural impairment.

The clinical use of proteomic analysis of body fluids like blood and urine is an emerging and promising field of research made possible through recent advances in high-throughput methods. As a non-hypothesis-driven approach, the identification of protein/peptide biomarkers by proteomic analysis may provide a novel modality for diagnosis, prognostication, and treatment guidance as well as for development of new treatment strategies [5]. Previous studies have used urine proteome analysis (UPA) to identify patterns of urinary peptide biomarkers for coronary artery disease and preclinical left ventricular diastolic dysfunction (LVDD) [5,6]. These biomarkers were utilized to establish specific disease classifiers. This approach has not yet been applied to HFrEF. Potential benefits of proteomic analysis for HFrEF management has been shown by Lemesle et al. who demonstrated that plasma multi-marker proteomic profiling can predict cardiovascular mortality in patients with chronic heart failure [7].

The aim of the present case-control study was therefore to assess the feasibility of UPA for the identification of a HFrEF-related urinary peptide biomarker pattern and the usability of such a pattern to establish a diagnostic HFrEF classifying algorithm.

## Methods

### Study population

HFrEF patients were enrolled prospectively at their first visit to a heart failure clinic at the North Zealand Hospital in Denmark (N = 149) as described in detail previously [8]. Urine samples from these 149 HFrEF patients were analyzed by CE-MS-based UPA performed by Mosaiques Diagnostics GmbH (Hanover, Germany) and 127 passed all quality control criteria [9] and were thus included in the present study. All patients were known to have heart failure (HF) with left ventricular ejection fraction (LVEF) <45% [10] and were referred to the clinic for up-titration of guideline recommended therapy. To be included, the patients had to be in a stable condition with no hospital admissions for a minimum of 60 days and plasma creatinine had to be stable ( $\pm$  10  $\mu$ g/l) for a period of 60 days. Descriptions of coronary angiography were retrieved when available, for categorizing the patients as having non-ischemic or ischemic heart disease [11]. Patients collected a 24-hour urine sample, starting on the day before the exam and delivered spontaneously voided urine on the day of the exam for UPA. Fasting venous blood samples were taken and patients underwent echocardiography.

**Table 1. Demographics and clinical features of study participants.**

|                                              | control (N = 581) | HFrEF (N = 127)  | LVDD (N = 176) |
|----------------------------------------------|-------------------|------------------|----------------|
| Gender, male / female                        | 268 / 283         | 95 / 32          | 77/99          |
| Age, years                                   | 47 ± 13           | 70 ± 10*         | 64 ± 13*       |
| NYHA I / II / III / IV                       | n.a.              | 28 / 62 / 34 / 3 | n.a.           |
| LVEF (%)                                     | 69 ± 6            | 32 ± 9*          | 70 ± 8         |
| Aetiology (N; ischemic/non-ischemic)         | n.a.              | 65/47            | n.a.           |
| Atrial fibrillation                          | n.a.              | 46               | n.a.           |
| Hypertension (N, (% of N <sub>total</sub> )) | 185 (32)          | 77 (61)          | 132 (75)       |
| Systolic blood pressure (mm Hg)              | 126 ± 15          | 129 ± 22         | 140 ± 19*      |
| Diastolic blood pressure (mm Hg)             | 80 ± 9            | 76 ± 13*         | 82 ± 10*       |
| BMI (kg/m <sup>2</sup> )                     | 26 ± 4            | 27 ± 6*          | 28 ± 5*        |
| eGFR (MDRD; ml/min/1,73m <sup>2</sup> )      | 82 ± 15           | 72 ± 24*         | 72 ± 15*       |
| Diabetes type 2 (N)                          | 4                 | 26               | 5              |

LVDD, left ventricular diastolic dysfunction; NYHA, New York Heart Association; LVEF, left ventricular ejection fraction; eGFR, estimated glomerular filtration rate

\* One-way ANOVA in regard to control with P < 0.05

doi:10.1371/journal.pone.0157167.t001

CE-MS based urinary proteome profiles of 581 control urine samples of individuals without heart failure and 176 urine samples of asymptomatic individuals diagnosed with preclinical LVDD [6] were provided by Mosaiques Diagnostics GmbH and originated from the Flemish Study on Environment, Genes and Health Outcomes (FLEMENGHO). Briefly, in this cohort left ventricular function was assessed by echocardiography and preclinical LVDD defined as (1) an abnormally low age-specific transmitral E/A ratio indicative of impaired relaxation, but without evidence of increased LV filling pressures ( $E/e' \leq 8.5$ ), (2) mildly-to-moderately elevated LV filling pressure ( $E/e' > 8.5$ ) and an E/A ratio within the normal age-specific range or (3) an elevated E/e' ratio and an abnormally low age-specific E/A ratio (combined dysfunction). Differences in durations between the transmitral A flow and the reverse PV flow during atrial systole ( $Ad < ARd + 10$ ) and/or LA volume index ( $\geq 28 \text{ mL/m}^2$ ) were checked to confirm possible elevation of the LV filling pressures in group 2. For staging LV diastolic dysfunction, the mitral inflow and TDI velocities were combined.

The study complies with the Declaration of Helsinki, and all subjects provided informed oral and written consent. The study was approved by the local Ethical Committee of the capital region of Denmark (H-1-2010-074) and Commissie Medische Ethiek van de Universitaire Ziekenhuizen Kuleuven, U.Z. Gasthuisberg E330 Leuven, Belgium (ML4804).

To identify and validate the HFrEF-related urinary peptide biomarkers potentially discriminating between HFrEF and healthy individuals, these HFrEF patients and healthy control individuals were divided into a biomarker discovery cohort and a validation cohort. Overall, study participants had rather well preserved kidney function (Table 1) but 38 HFrEF patients (29.9%) and 19 controls (3.4%) had moderate to severe chronic kidney disease (CKD) with an estimated glomerular filtration rate (eGFR) < 60 ml/min/1,73m<sup>2</sup> (CKD stage 3–5).

**Selection of HFrEF patients and controls for biomarker discovery.** For the discovery of HFrEF-related urinary peptide biomarkers, HFrEF patients have been selected to be representative of the patient cohort with regard to New York Heart Association (NYHA) class, left ventricular ejection fraction and ischemic and non-ischemic aetiology of HFrEF. However, with regard to kidney function the selection was only partly representative since patients with severely impaired kidney function (CKD stage 4 and 5; eGFR  $\leq 30 \text{ ml/min/1.73m}^2$ ) have not

**Table 2. Demographics and clinical features of individuals in the cohort for biomarker discovery and creation of the HFrEF classifiers.**

|                                         | control (N = 29) | HFrEF-NI (N = 13) | HFrEF-I (N = 20) |
|-----------------------------------------|------------------|-------------------|------------------|
| Gender, male / female/ % female         | 21 / 8 / 27.6    | 11 / 2 / 15.4     | 15 / 5 / 25      |
| Age, years (range)                      | 67 ± 7 (49–79)   | 65 ± 8 (49–78)    | 72 ± 5* (64–81)  |
| NYHA I / II / III / IV                  | n.a.             | 4 / 7 / 2 / 0     | 4 / 8 / 6 / 2    |
| LVEF, %                                 | 71 ± 8           | 38 ± 8*           | 29 ± 8*          |
| Atrial fibrillation                     | n.a.             | 7                 | 3                |
| Hypertension                            | 20               | 0                 | 0                |
| Systolic blood pressure (mm Hg)         | 138 ± 14         | 123 ± 20*         | 120 ± 21*        |
| Diastolic blood pressure (mm Hg)        | 80 ± 8           | 74 ± 14           | 74 ± 10*         |
| BMI (kg/m <sup>2</sup> )                | 29 ± 6           | 28 ± 5            | 25 ± 4*          |
| eGFR (MDRD; ml/min/1.73m <sup>2</sup> ) | 76 ± 12          | 79 ± 17           | 69 ± 27          |

NYHA, New York Heart Association; LVEF, left ventricular ejection fraction; eGFR, estimated glomerular filtration rate; HFrEF-NI, heart failure with reduced ejection fraction with non-ischemic etiology; HFrEF-I, heart failure with reduced ejection fraction with ischemic etiology

\* One-way ANOVA in regard to control with P < 0.05

doi:10.1371/journal.pone.0157167.t002

been considered for biomarker discovery to limit a bias in the HFrEF-relevant peptide biomarker pattern due to CKD-relevant peptides. HFrEF patients with cancer have also been excluded from biomarker discovery. Due to the fact that CKD is a common comorbidity in acute and/or chronic heart failure result in increased complications and mortality [12,13], HFrEF patients with an eGFR between 30 and 60 ml/min/1.73m<sup>2</sup> were randomly selected in a number representative of the patient cohort. This resulted in the selection of 33 HFrEF patients for biomarker discovery comprising 13 patients with non-ischemic and 20 patients with ischemic aetiology. The controls were individuals from the FLEMENGHO cohort without cardiovascular conditions at baseline and/or during follow-up that were best matched with the HFrEF patients for age, sex and eGFR. The controls selected for biomarker discovery were thus only partly representative of the FLEMENGHO cohort. Individuals omitted in biomarker discovery were assessed in validation. The clinical characteristics of these selected patients and controls are presented in Table 2.

### Sample preparation and CE-MS analysis

All urine samples for CE-MS analyses were taken from spontaneously voided urine at the day of the exam and stored at -80°C until analysis. For proteomic analysis, a 0.7 mL aliquot of urine was thawed immediately before use and diluted with 0.7 mL of 2 M urea, 10 mM NH<sub>4</sub>OH containing 0.02% SDS. To remove higher molecular mass proteins, such as albumin and immunoglobulin G, the sample was ultra-filtered using Centriscart ultracentrifugation filter devices (20 kDa MWCO; Sartorius, Goettingen, Germany) at 3,000 rcf until 1.1 ml of filtrate was obtained. This filtrate was then applied onto a PD-10 desalting column (GE Healthcare, Uppsala, Sweden) equilibrated in 0.01% NH<sub>4</sub>OH in HPLC-grade in H<sub>2</sub>O (Roth, Germany) to decrease matrix effects by removing urea, electrolytes, salts, and to enrich polypeptides present. Finally, all samples were lyophilized, stored at 4°C, and suspended in HPLC-grade H<sub>2</sub>O shortly before CE-MS analyses, as described [14].

CE-MS analyses were performed using a P/ACE MDQ capillary electrophoresis system (Beckman Coulter, Fullerton, USA) on-line coupled to a microTOF MS (Bruker Daltonics, Bremen, Germany) as described previously [14,15]. The ESI sprayer (Agilent Technologies, Palo Alto, CA, USA) was grounded, and the ion spray interface potential was set between -4 and -4.5 kV. Data acquisition and MS acquisition methods were automatically controlled by

the CE *via* contact-close-relays. Spectra were accumulated every 3 s, over a range of  $m/z$  350 to 3000. Accuracy, precision, selectivity, sensitivity, reproducibility, and stability of the CE-MS measurements were demonstrated elsewhere [14].

**Mass spectrometry data processing.** Mass spectral peaks representing identical molecules at different charge states were deconvoluted into single masses using MosaiquesVisu software [16]. Only signals with  $z > 1$  observed in a minimum of 3 consecutive spectra with a signal-to-noise ratio of at least 4 were considered. Reference signals of 1770 urinary polypeptides were used for CE-time calibration by locally weighted regression. For normalization of analytical and urine dilution variances, signal intensities were normalized relative to 29 “housekeeping” peptides [17,18]. The obtained peak lists characterize each polypeptide by its molecular mass (Dalton; Da), normalized CE migration time (minutes; min) and normalized signal intensity. All detected peptides were deposited, matched, and annotated in a Microsoft SQL database allowing further statistical analysis [19]. For clustering, peptides in different samples were considered identical if mass deviation was  $< 50$  ppm. CE migration time was controlled to be below 0.35 minutes after calibration.

**Sequencing of polypeptides.** Identified heart failure biomarkers were *in silico* assigned to the previously sequenced peptides from Human urinary proteome database, version 2.0. Peptides from the Human urinary proteome database were sequenced as described elsewhere [20,21]. Briefly, urinary peptides were fragmented using different tandem mass spectrometry techniques with prior separation step with CE or HPLC. Fragmentation spectra were matched to the protein sequences from the up-to-date databases (IPI, NCBI nr and Uniprot) using MS/MS search engines MASCOT (Matrix Sciences Ltd., London, UK) and OMSSA (The National Center for Biotechnology Information, Bethesda, USA). Characteristic for urinary proteins post-translational modifications (PTM), such as hydroxylation of lysine and proline, and mass spectrometer specific settings were used. Identified peptide sequences from LC-MS analyses were verified by the comparison of experimental and theoretical CE migration time, which is dependent on the number of basic and neutral polar amino acid.

**Definition of biomarkers.** For biomarker discovery, statistical analysis of the selected urinary proteome profiles was performed using non-parametric Wilcoxon rank sum test. Only biomarkers that were found at a 70% frequency or higher in either case or control group were examined. The false discovery rate adjustments of Benjamini-Hochberg [22] were employed to correct for multiple testing. A p-value less than 0.05 was considered to be statistically significant.

**Support vector machine (SVM) modelling.** HFREF-related peptide biomarkers were combined into single summary multidimensional classifying variables, hereinafter referred to as classifiers, based on non-ischemic and ischemic aetiologies, using the support-vector machine based MosaCluster proprietary software, version 1.7.0 [23]. These classifiers based on SVM modelling allowed the classification of samples in the high dimensional data space. MosaCluster calculated classification scores based on the amplitudes of the HFREF biomarkers. Classification is performed by determining the Euclidian distance (defined as the SVM classification score) of the vector to a maximal margin hyperplane. The SVM classifier uses the log transformed intensities of  $x$  features (peptides) as coordinates in a  $x$ -dimensional space. It then builds a  $x-1$  dimensional hyperplane that spans this space by performing a quadratic programming optimisation of a Lagrangian using the training labels only while allowing for samples to lie on the wrong side of the plane. For such mistakes in classification the SVM introduces a cost parameter  $C$ . Because non-separable problems in low dimensions may be separable in higher dimensions the SVM uses the Kernel-trick to transform the samples to a higher dimensional space. MosaCluster uses the standard radial basis functions as kernel. These functions are just Gaussians with the parameter gamma controlling their width. The optimal parameters



C and gamma are found via e.g. leave one out cross validation error estimation. There are generally implemented in SVMs in all popular data mining software, particularly the kernlab cran contributed R package is a versatile tool for building SVM based-classifiers [24]. After identification of significant biomarkers and generation of different classifiers, they were assessed in a test set to check their performance.

## Other Measurements

Echocardiography was performed using a Vivid 9E [8,25] and Vivid7 Pro [6] (General Electric, Horten, Norway), and images were transferred to a remote workstation for offline analysis (Echopac, General Electric, Horten, Norway). Two dimensional parasternal images were used to determine LV dimensions and LVEF was determined from the biplane Simpson model. Blood pressure was the average of five consecutive auscultator readings obtained according to European guideline with a standard mercury sphygmomanometer with the participant in the seated position for at least 10 minutes. As described elsewhere, we applied a stringent quality control program to the blood pressure measurements, looking for digit and number preference [26,27]. Hypertension was defined as elevated blood pressure of at least 140 mm Hg systolic or 90 mm Hg diastolic at the time of inclusion in the study, use of antihypertensive drugs at the time of inclusion in the study and/or a history of elevated blood pressure. Body mass index was weight in kilograms divided by the square of height in meters. Glomerular filtration rate was estimated from the Chronic Kidney Disease Epidemiology Collaboration equation [28].

## Statistical methods and sample classification

By maximizing Youden's index, we determined optimal thresholds for the HFrEF classifiers to differentiate normal individuals from HFrEF patients based on exact binomial calculations and were carried out in MedCalc version 12.7.3.0 (MedCalc Software, Mariakerke, Belgium, <http://www.medcalc.be>). Estimates of sensitivity and specificity and their confidence intervals (95% CI) were calculated based on tabulating the number of correctly classified samples and exact binomial calculations. The Receiver Operating Characteristic (ROC) plot was obtained and the area under the ROC curve (AUC) was evaluated. The reported unadjusted p-values were calculated using the natural logarithm-transformed intensities and the Gaussian approximation to the t-distribution. Statistical adjustment due to the existence of multiple test sets was performed by using the Westfall and Young maxT-procedure [29], by adjusting according to Bonferroni [30], and by applying the Benjamini-Hochberg function to the entire dataset (case vs. control) [31,32].

Means were compared using the large-sample z-test or ANOVA and proportions by Fisher's exact test. Statistical significance was a 1-sided significance level of 0.05.

We used Cox regression to compute standardized hazard ratios. The baseline characteristics considered as covariates in Cox regression were sex, age, body mass index, systolic blood pressure and history of cardiovascular disease. We identified covariates to be retained in the analyses by a step-down procedure, removing the least significant covariates at each step until all P-values of covariates were less than 0.05. We applied the generalized  $R^2$  statistic to assess the contribution of HFrEF classifiers to risk over and beyond other risk factors.

## Results

### Characteristics of participants

Clinical characteristics of all 884 study participants comprising HFrEF patients and controls are presented in Table 1. Overall, patients with HFrEF as compared with control individuals were more likely to be older, and to have lower eGFR and hypertension.

## Identification of HFrEF biomarkers

Univariate analysis and correction for multiple testing identified a pattern of 103 distinct HFrEF-related peptide biomarkers which differed significantly ( $p < 0.05$ ) between HFrEF and control proteomic profiles. Overall 65 of the 103 peptides could be characterized by sequence and post-translational modifications (Table 3). The majority of the sequenced peptides originated from constituents of the extracellular matrix (ECM), i.e. fragments of various types of mostly fibrillar collagens. The collagens comprise type I ( $N = 34$ ), II ( $N = 3$ ), III ( $N = 13$ ), V ( $N = 1$ ), XVI ( $N = 1$ ) and XXIV ( $N = 1$ ), respectively. Other peptides originated e.g. from alpha-1-antitrypsin, apolipoprotein A-I, complement C3, fibrinogen beta chain, retinol-binding protein 4, and histone-lysine N-methyltransferase MLL4/WBP7. Comparisons between the HFrEF-related pattern identified in this study and the recently published patterns of 85 and 273 urinary peptides related to preclinical LVDD (classifier HF1) [6,33] and CKD (classifier CKD273) [34] revealed 7 common peptides for the LVDD pattern and 24 common peptides for the CKD pattern (Table 3). For 5 out of the 7 peptides in common with LVDD sequence information was available with 4 originating from type I collagen and 1 from apolipoprotein A-1. These 5 common sequenced peptides also showed a comparable differential excretion in both conditions. The mass spectrometry amplitude data of all peptides of all study subjects is provided as supporting information (S1, S2 and S3 Tables).

## HFrEF classifier modelling

First, the pattern of 103 HFrEF-related peptide biomarkers was used for subsequent SVM based modelling of a proteomic HFrEF disease classifier. The resulting classifier HFrEF103 showed a radial basis function kernel with parameters  $C = 6.4$  and  $\gamma = 0.001024$ . To determine the contribution of the 24 peptides in common with CKD273, we also modelled an HFrEF classifier based on the 79 remaining peptides. The resulting classifier HFrEF79 showed a radial basis function kernel with parameters  $C = 12.8$  and  $\gamma = 0.001024$ . Both classifiers allowed correct classification of all 33 HFrEF patients and all 29 controls of the discovery cohort resulting in sensitivity and specificity of 100% upon complete cross-validation of HFrEF103 derived score factors in ROC analysis.

**Validation of HFrEF disease classifiers.** The discriminatory power of HFrEF103 and HFrEF79 was tested by assessing the proteome profiles of the remaining 94 HFrEF patients with ischemic ( $N = 34$ ), non-ischemic ( $N = 45$ ) or uncertain aetiology ( $N = 15$ ). They were between 38 and 94 years of age with various stages of renal impairment (eGFR between 11 and 140 ml/min/1.73m<sup>2</sup>). The validation data set further comprised profiles of 552 controls without heart failure between 20 and 84 years of age with various stages of renal impairment (eGFR between 44 and 138 ml/min/1.73m<sup>2</sup>).

Applying HFrEF103 to this validation cohort resulted in very accurate discrimination between HFrEF patients and control individuals. Sensitivity in patients with HFrEF reached 93.6% (86.6–97.6) and specificity in control individuals with and without impaired kidney function and hypertension 92.9% (90.5–94.9) based on an optimized HFrEF score factor threshold of  $> -0.083$  (Table 4). An HFrEF score factor generated by HFrEF103 above this threshold thus indicated a large increase in the likelihood of HFrEF as specified by a positive likelihood ratio of 13.25. The negative likelihood ratio of 0.07 further indicated that a HFrEF score factor below the threshold largely ruled out HFrEF. An AUC of 0.972 (0.957–0.984;  $p < 0.0001$ ) in ROC analysis of the score factors also confirmed the discriminatory power of HFrEF103 (Fig 1). A comparable but nonetheless significantly ( $p = 0.0119$ ) lower discriminatory power of HFrEF79 was shown by an AUC of 0.954 (0.936–0.969;  $p < 0.0001$ ) (Fig 1) with





Table 3. (Continued)

| Peptide ID | Mass    | Theor. mass | Sequence                        | Protein Symbol | Protein name                                          | Accession number | Start AA | Stop AA | HFREF DE <sup>1</sup> | Com |
|------------|---------|-------------|---------------------------------|----------------|-------------------------------------------------------|------------------|----------|---------|-----------------------|-----|
| 61304      | 1818.83 | 1818.84     | GLpGTGGpPGENGKpGEPGp            | COL3A1         | Collagen alpha-1(III) chain                           | P02461           | 642      | 661     | 6.7 ± 5.4             | 2   |
| 61945      | 1834.82 | 1834.83     | GLpGTGGpPGENGKpGEPGp            | COL3A1         | Collagen alpha-1(III) chain                           | P02461           | 642      | 661     | 4.0 ± 5.3             |     |
| 45950      | 1551.70 | 1551.68     | GTGGpPGENGKpGEPGp               | COL3A1         | Collagen alpha-1(III) chain                           | P02461           | 645      | 661     | 4.7 ± 3.4             |     |
| 52769      | 1649.73 | 1649.78     | ApGAPGGKGDAGAPGERGp             | COL3A1         | Collagen alpha-1(III) chain                           | P02461           | 667      | 685     | -1.3 ± 0.7            |     |
| 36784      | 1405.69 | 1405.69     | DGVPGKDGPRGPTGP                 | COL3A1         | Collagen alpha-1(III) chain                           | P02461           | 752      | 766     | 2.4 ± 2.2             |     |
| 18943      | 1114.49 | 1114.49     | SpGERGETGpP                     | COL3A1         | Collagen alpha-1(III) chain                           | P02461           | 796      | 806     | -3.7 ± 0.4            |     |
| 95746      | 2507.13 | 2507.13     | ApGQNGEPGGKGERGAPGEKGGGpPpG     | COL3A1         | Collagen alpha-1(III) chain                           | P02461           | 814      | 840     | 7.7 ± 3.0             |     |
| 71171      | 2023.91 | 2023.92     | GEPGGKGERGAPGEKGGGpPG           | COL3A1         | Collagen alpha-1(III) chain                           | P02461           | 819      | 840     | 3.2 ± 2.3             | 2   |
| 69882      | 1993.88 | 1993.88     | SEGSPGHpGQpGpPpGpGp             | COL3A1         | Collagen alpha-1(III) chain                           | P02461           | 1174     | 1195    | 2.7 ± 2.0             |     |
| 113351     | 2887.35 | 2887.37     | GpSGpVpGpGLAGERGEQpGpGPTGFQGLPG | COL5A2         | Collagen alpha-2(V) chain                             | P05997           | 651      | 681     | 5.1 ± 5.3             |     |
| 41770      | 1473.63 | 1473.66     | GpGpAGERGHpGpGp                 | COL16A1        | Collagen alpha-1(XVI) chain                           | Q07092-2         | 1401     | 1416    | -1.5 ± 1.3            |     |
| 67723      | 1945.88 | 1945.77     | QGDVGPpGEmGmEGPPGTEG            | COL24A1        | Collagen alpha-1(XIV) chain                           | Q17RW2-2         | 998      | 1017    | 34.2 ± 3.2            |     |
| 108021     | 2754.27 | 2754.28     | EGVQKEDIPPADLSDQVPDTESETR       | C3             | Complement C3 (C3g fragment)                          | P01024           | 955      | 979     | -2.2 ± 0.4            |     |
| 51184      | 1630.83 | 1630.83     | EEAPSLRPAPPPISSGGG              | FGB            | Fibrinogen beta chain                                 | P02675           | 54       | 70      | -4.3 ± 0.6            |     |
| 19046      | 1116.53 | 1116.57     | PTSRYIHFP                       | WBP7           | Histone-lysine N-methyltransferase                    | Q9UMN6           | 2030     | 2038    | 13.1 ± 0.8            |     |
| 18300      | 1106.50 | 1106.54     | AQYEEIAQR                       | KRT4           | Keratin                                               | F5H8K9           | 293      | 301     | 2.8 ± 1.4             |     |
| 49958      | 1608.73 | 1608.73     | SGDSDDEPPPLRL                   | PGRMC1         | Membrane associated progesterone receptor component 1 | O00264           | 54       | 68      | -1.8 ± 1.1            | 2   |
| 14071      | 1032.50 | 1032.54     | RVAPEEHPV                       | POTEF          | POTE ankyrin domain family member F                   | A5A3E0           | 795      | 803     | -2.5 ± 0.4            |     |
| 60751      | 1807.81 | 1807.88     | SVDETGmSATAKGRVR                | RBP4           | Retinol-binding protein 4                             | P02753           | 64       | 80      | -1.6 ± 0.6            |     |
| 53181      | 1653.88 | 1653.90     | SGSVIDQSRVNLGPI                 | UMOD           | Uromodulin                                            | P07911           | 589      | 604     | -1.8 ± 0.8            | 2   |
| 44633      | 1523.84 | 1523.87     | VIDQSRVNLGPIT                   | UMOD           | Uromodulin                                            | P07911           | 592      | 605     | -3.6 ± 0.7            | 2   |
| 20226      | 1137.67 | 1137.70     | RVLNLGPITR                      | UMOD           | Uromodulin                                            | P07911-2         | 597      | 606     | 52.4 ± 8.5            |     |

Peptides (N = 103) discriminatory for HFREF. The differential excretion (DE) of peptides between HFREF and controls has been calculated as follows: For mean MS amplitude HFREF > mean MS amplitude control: (mean amplitude HFREF x frequency) / (mean amplitude control x frequency); for mean MS amplitude HFREF < mean MS amplitude control:— (mean amplitude control x frequency) / (mean amplitude HFREF x frequency). For calculating means, values from all samples were used, considering 0 for undetected values. HFREF, Heart failure with reduced ejection fraction; mass, molecular weight in Da; CE time, CE-migration time in min; Peptide ID, polypeptide identifier annotated by the SQL database; Start AA / Stop AA, start and stop amino acid of the identified peptide; Com, peptides commonly shared with the peptide biomarker patterns of the classifier HF1 (1) for preclinical LVDD [33] and CKD273 (2) for chronic kidney disease; p in peptide sequences, oxidized prolines; m in peptide sequences, oxidized methionines.

doi:10.1371/journal.pone.0157167.t003

a sensitivity of 89.5% (81.5–94.8) and a specificity of 93.6% (91.3–95.5) based on an optimized HFrEF score factor threshold of > 0.018.

**Diagnosis of HFrEF at NYHA class I.** In the validation data set 20 (21%) out of the 94 HFrEF patients had no symptoms of heart failure during ordinary activities thus being NYHA class I [35]. These patients can therefore be considered as individuals with preclinical left ventricular systolic dysfunction (LVSD). Importantly, HFrEF103 classified this group with a sensitivity of 95% (75.1–99.9) based on the HFrEF score factor threshold of > -0.083. Further assessing the diagnostic performance for LVSD by using HFrEF103 score factors as a dichotomous variable (0 = HFrEF103 score factor < -0.083; 1 = HFrEF103 score factor > -0.083) in multivariate logistic regression analysis revealed a high stepwise covariate-adjusted (age, sex and eGFR) odds ratio of 650 (37–11353;  $p < 0.0001$ ).

**Correlation analysis.** Rank correlations (Spearman’s rho) were observed between the HFrEF score factors and age reaching a rho value of  $\rho = 0.295$  (95% CI 0.223–0.364;  $p < 0.0001$ ) and LVEF reaching a rho value of  $\rho = -0.359$  (95% CI -0.425 to -0.288;  $p < 0.0001$ ).

### Classification of individuals with preclinical LVDD

HFrEF103 was based on urinary peptide biomarkers relevant for HFrEF and thus primarily systolic dysfunction. This included individuals with preclinical LVSD (NYHA class I). To evaluate if HFrEF103 would also classify individuals with preclinical LVDD as diseased, HFrEF103 was utilized to assess urinary proteome profiles of 176 individuals with preclinical LVDD [6]. If HFrEF103 would classify individuals with LVSD as diseased but not—or at least only to a very limited degree—individuals with LVDD/DLVD, this would suggest considerable differences in pathological mechanisms. The resulting sensitivity in individuals with preclinical LVDD was indeed low and reached only 12.5% (Table 4).

### Discussion

This is a pilot study using CE-MS-based urinary proteomic analysis in HFrEF patients with limited concomitant impairment of kidney function. Major findings include the identification of peptide biomarkers associated with HFrEF and their value for SVM-modelling of the HFrEF disease classifier HFrEF103. This classifier allowed discrimination between HFrEF patients and individuals with LVSD as well as individuals without heart failure with very high sensitivity and specificity, regardless of the aetiology of HFrEF. This opens the possibility of early diagnosis of HFrEF even before the disease progresses to an overt symptomatic stage. Moreover, the observed limited sensitivity in preclinical LVDD opens the possibility of differential heart failure diagnosis.

**Table 4. Contingency table of HFrEF103 results in the validation cohort and preclinical LVDD evaluation.**

|                                  | Control | HFrEF | Total | LVDD |
|----------------------------------|---------|-------|-------|------|
| <b>HFrEF classifier positive</b> | 39      | 88    | 127   | 22   |
| <b>HFrEF classifier negative</b> | 513     | 6     | 519   | 154  |
| <b>Totals</b>                    | 552     | 94    | 646   | 176  |

Classification results of proteome peptide profiles of the validation cohort of 94 HFrEF patients and 552 control individuals without HFrEF as well as the set of 176 LVDD patients by the classifier HFrEF103. HFrEF, Heart failure with reduced ejection fraction.

doi:10.1371/journal.pone.0157167.t004

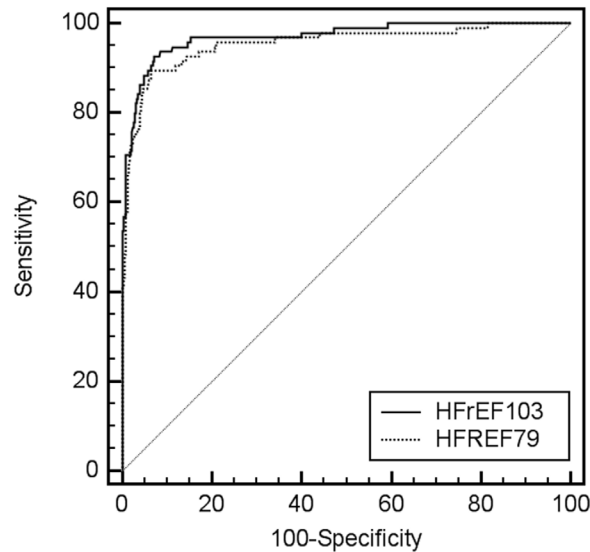

**Fig 1. Receiver operating characteristic (ROC) curve for the HFrEF score factors of the validation proteome profile set (N = 646) based on HFrEF103 (solid line) and HFrEF79 (dotted line).**

doi:10.1371/journal.pone.0157167.g001

The remarkable performance of the classifier probably reflects extensive depiction of molecular phenotypic alterations associated with HFrEF. Peptides of fibrillar type I and III collagens were found to be predominantly represented among the identified biomarkers. These collagens are important components of the myocardial extracellular matrix (ECM) [36]. The major component is type I collagen (85% of ECM proteins) which provides cardiac rigidity and determines stiffness [37] while type III collagen (10%) contributes to elasticity [38]. Sustained fibrotic remodelling of the ventricular ECM is part of the molecular pathology of heart failure. Excess deposition of interstitial fibrous tissue, collagen cross-linking increasing resistance to degradation, and altered activities of proteinases involved in ECM turnover and collagen synthesis contribute to remodelling [39,40]. Endomyocardial inflammation propagates those processes [41]. Different combinations of these processes may cause the observed specific patterns of positive and negative differential excretion of peptidic fibrillar collagen fragments. On the functional level, ECM remodelling contributes to perturbed cardiac mechanics together with altered left ventricular chamber geometry and volume [42,43]. While some of the ECM remodelling processes may be characteristic for HFrEF, others appear to be of more common nature as indicated by the peptide biomarker patterns for HFrEF, preclinical LVDD and CKD. These patterns include both, unique as well as common type I and III collagen fragments. Interestingly, the urinary peptide biomarker patterns for HFrEF and preclinical LVDD [33] have only 4 type I collagen fragments in common (Table 3) indicating pronounced differences in ECM remodelling. The fact that the patterns for HFrEF and CKD [34] share 20 fragments of type I and III collagen may be due to the accompanying renal disease as a frequent comorbidity in HFrEF. However, while significant, their relevance for the discriminatory power of HFrEF103 still appears to be rather limited.

In addition to the peptidic collagen fragments, the biomarker pattern includes a peptidic fragment of alpha-1-antitrypsin (AAT), which showed a positive differential excretion (Table 3). Levels of AAT have indeed already been shown to increase progressively across NYHA classes and associate with B-type natriuretic peptide (BNP) [44]. This was suggested to be a compensatory mechanism for the loss of antiprotease activity due to oxidative stress.

In conclusion, in this pilot study HFrEF-related urinary peptide biomarkers identified by CE-MS-based UPA could be utilized to establish a classifier that discriminates between HFrEF patients and controls as well as LVDD patients.

However, there are certain limitations to our study which need consideration. Patients and controls originated from different centres and we did not have a fully independent external validation cohort to assess a potential centre bias. However, the vast majority of patients as well as controls included in the present study were Caucasians from central Europe. Another issue is that peptides were measured in urine only. Therefore we could not determine their source of origin nor could it be established if the changes seen in HFrEF patients are only due to direct cardiac alterations and not also due to non-cardiac organ dysfunction secondary to heart failure. Renal dysfunctions, which are often associated with heart failure [12,13,44] are especially relevant in this context. Therefore HFrEF patients and control individuals included for biomarker discovery have been stratified for mostly no to only mild impairments of kidney function (CKD stage 2) and matched for eGFR to avoid a kidney function bias. Finally, not all identified polypeptides were sequenced.

In spite of these limitations the results are of scientific interest depicting the potential diagnostic power of a multi-biomarker approach mirroring various HFrEF-associated pathological alterations. Large-scale evaluation and validation is needed to assess the full potential value of the UPA-based classifier.

## Supporting Information

**S1 Table. MS data of HFrEF patients.**  
(TXT)

**S2 Table. MS data of LVDD patients.**  
(TXT)

**S3 Table. MS data of Control individuals.**  
(TXT)

## Acknowledgments

The project was partly funded by the European Union grants EU-MASCARA (HEALTH-2011.2.4.2–2) and HOMAGE (HEALTH-F7-305507 HOMAGE) as well as the Murermester Laurits P Christensens Fund and the Kaptajnløjtnant Harald Jensen og Hustrus Fund. These funders had no role in study design, data collection and analysis, decision to publish, or preparation of the manuscript.

## Author Contributions

Conceived and designed the experiments: KR HB FG MS JS HM T. Koeck. Performed the experiments: KR HB FG MS JS ZYZ YMG T. Koeck MS ENK. Analyzed the data: KR MS FG HM T. Koeck ENK T. Kuznetsova. Contributed reagents/materials/analysis tools: KR HB FG MS JS ZYZ YMG T. Koeck MS T. Kuznetsova HM. Wrote the paper: KR T. Koeck MS.

## References

1. Brouwers FP, de Boer RA, van der HP, Voors AA, Gansevoort RT, Bakker SJ, et al. Incidence and epidemiology of new onset heart failure with preserved vs. reduced ejection fraction in a community-based cohort: 11-year follow-up of PREVEND. *Eur Heart J.* 2013; 34(19): 1424–1431. doi: [10.1093/eurheartj/eh066](https://doi.org/10.1093/eurheartj/eh066) PMID: [23470495](https://pubmed.ncbi.nlm.nih.gov/23470495/)

2. Braunwald E. Biomarkers in heart failure. *N Engl J Med*. 2008; 358(20): 2148–2159. doi: [10.1016/j.ejheart.2008.07.014](https://doi.org/10.1016/j.ejheart.2008.07.014) pmid: 18480207.
3. McMurray JJ, Adamopoulos S, Anker SD, Auricchio A, Bohm M, Dickstein K, et al. ESC Guidelines for the diagnosis and treatment of acute and chronic heart failure 2012: The Task Force for the Diagnosis and Treatment of Acute and Chronic Heart Failure 2012 of the European Society of Cardiology. Developed in collaboration with the Heart Failure Association (HFA) of the ESC. *Eur Heart J*. 2012; 33(14): 1787–1847. doi: [10.1093/eurheartj/ehs104](https://doi.org/10.1093/eurheartj/ehs104) PMID: [22611136](https://pubmed.ncbi.nlm.nih.gov/22611136/).
4. Pouleur AC. Which biomarkers do clinicians need for diagnosis and management of heart failure with reduced ejection fraction? *Clin Chim Acta*. 2014; 443: 9–16. doi: [10.1016/j.cca.2014.10.046](https://doi.org/10.1016/j.cca.2014.10.046) PMID: [25447693](https://pubmed.ncbi.nlm.nih.gov/25447693/).
5. Pejchinovski M, Hrnjez D, Ramirez-Torres A, Bitsika V, Mermelekas G, Vlahou A, et al. Capillary zone electrophoresis on-line coupled to mass spectrometry: A perspective application for clinical proteomics. *Proteomics Clin Appl*. 2015; 9(5–6): 453–68. doi: [10.1002/prca.201400113](https://doi.org/10.1002/prca.201400113) PMID: [25641766](https://pubmed.ncbi.nlm.nih.gov/25641766/)
6. Zhang Z, Staessen JA, Thijs L, Gu Y, Liu Y, Jacobs L, et al. Left ventricular diastolic function in relation to the urinary proteome: a proof-of-concept study in a general population. *Int J Cardiol*. 2014; 176(1): 158–165. doi: [10.1016/j.ijcard.2014.07.014](https://doi.org/10.1016/j.ijcard.2014.07.014) PMID: [25065337](https://pubmed.ncbi.nlm.nih.gov/25065337/).
7. Lemesle G, Maury F, Beseme O, Ovarit L, Amouyel P, Lamblin N, et al. Multimarker proteomic profiling for the prediction of cardiovascular mortality in patients with chronic heart failure. *PLoS One*. 2015; 10(4): e0119265. doi: [10.1371/journal.pone.0119265](https://doi.org/10.1371/journal.pone.0119265) PMID: [25905469](https://pubmed.ncbi.nlm.nih.gov/25905469/).
8. Bosselmann H, Tonder N, Soletormos G, Rossing K, Iversen K, Goetze JP, et al. Influence of renal impairment on myocardial function in outpatients with systolic heart failure: an echocardiographic and cardiac biomarker study. *Int J Cardiol*. 2014; 177(3): 942–948. doi: [10.1016/j.ijcard.2014.09.202](https://doi.org/10.1016/j.ijcard.2014.09.202) PMID: [25449505](https://pubmed.ncbi.nlm.nih.gov/25449505/).
9. Mischak H, Vlahou A, Ioannidis JP. Technical aspects and inter-laboratory variability in native peptide profiling: the CE-MS experience. *Clin Biochem*. 2013; 46(6): 432–443. doi: [10.1016/j.clinbiochem.2012.09.025](https://doi.org/10.1016/j.clinbiochem.2012.09.025) PMID: [23041249](https://pubmed.ncbi.nlm.nih.gov/23041249/).
10. Dickstein K, Cohen-Solal A, Filippatos G, McMurray JJ, Ponikowski P, Poole-Wilson PA, et al. ESC Guidelines for the diagnosis and treatment of acute and chronic heart failure 2008: the Task Force for the Diagnosis and Treatment of Acute and Chronic Heart Failure 2008 of the European Society of Cardiology. Developed in collaboration with the Heart Failure Association of the ESC (HFA) and endorsed by the European Society of Intensive Care Medicine (ESICM). *Eur Heart J*. 2008; 29(19): 2388–2442. doi: [10.1093/eurheartj/ehn309](https://doi.org/10.1093/eurheartj/ehn309) PMID: [18799522](https://pubmed.ncbi.nlm.nih.gov/18799522/).
11. Felker GM, Shaw LK, O'Connor CM. A standardized definition of ischemic cardiomyopathy for use in clinical research. *J Am Coll Cardiol*. 2002; 39(2): 210–218. PMID: [11788209](https://pubmed.ncbi.nlm.nih.gov/11788209/).
12. Mentz RJ, Kelly JP, von Lueder TG, Voors AA, Lam CS, Cowie MR, et al. Noncardiac comorbidities in heart failure with reduced versus preserved ejection fraction. *J Am Coll Cardiol*. 2014; 64(21): 2281–2293. doi: [10.1016/j.jacc.2014.08.036](https://doi.org/10.1016/j.jacc.2014.08.036) PMID: [25456761](https://pubmed.ncbi.nlm.nih.gov/25456761/).
13. Braam B, Joles JA, Danishwar AH, Gaillard CA. Cardiorenal syndrome—current understanding and future perspectives. *Nat Rev Nephrol*. 2014; 10(1): 48–55. doi: [10.1038/nrneph.2013.250](https://doi.org/10.1038/nrneph.2013.250) PMID: [24247284](https://pubmed.ncbi.nlm.nih.gov/24247284/).
14. Theodorescu D, Wittke S, Ross MM, Walden M, Conaway M, Just I, et al. Discovery and validation of new protein biomarkers for urothelial cancer: a prospective analysis. *Lancet Oncol*. 2006; 7(3): 230–240. PMID: [16510332](https://pubmed.ncbi.nlm.nih.gov/16510332/).
15. Wittke S, Mischak H, Walden M, Kolch W, Radler T, Wiedemann K. Discovery of biomarkers in human urine and cerebrospinal fluid by capillary electrophoresis coupled to mass spectrometry: towards new diagnostic and therapeutic approaches. *Electrophoresis*. 2005; 26(7–8): 1476–1487. PMID: [15765478](https://pubmed.ncbi.nlm.nih.gov/15765478/).
16. Neuhoff N, Kaiser T, Wittke S, Krebs R, Pitt A, Burchard A, et al. Mass spectrometry for the detection of differentially expressed proteins: a comparison of surface-enhanced laser desorption/ionization and capillary electrophoresis/mass spectrometry. *Rapid Communications in Mass Spectrometry*. 2004; 18(2): 149–156. PMID: [14745763](https://pubmed.ncbi.nlm.nih.gov/14745763/).
17. Haubitz M, Good DM, Woywodt A, Haller H, Rupprecht H, Theodorescu D, et al. Identification and validation of urinary biomarkers for differential diagnosis and evaluation of therapeutic intervention in ANCA associated vasculitis. *Mol Cell Proteomics*. 2009; 8(10): 2296–2307. doi: [10.1074/mcp.M800529-MCP200](https://doi.org/10.1074/mcp.M800529-MCP200) PMID: [19564150](https://pubmed.ncbi.nlm.nih.gov/19564150/).
18. Jantos-Siwj J, Schiffer E, Brand K, Schumann G, Rossing K, Delles C, et al. Quantitative Urinary Proteome Analysis for Biomarker Evaluation in Chronic Kidney Disease. *J Proteome Res*. 2009; 8(1): 268–281. doi: [10.1021/pr800401m](https://doi.org/10.1021/pr800401m) PMID: [19012428](https://pubmed.ncbi.nlm.nih.gov/19012428/)
19. Dakna M, He Z, Yu WC, Mischak H, Kolch W. Technical, bioinformatical and statistical aspects of liquid chromatography-mass spectrometry (LC-MS) and capillary electrophoresis-mass spectrometry (CE-



- MS) based clinical proteomics: a critical assessment. *J Chromatogr B Analyt Technol Biomed Life Sci.* 2009; 877(13): 1250–1258. doi: [10.1016/j.jchromb.2008.10.048](https://doi.org/10.1016/j.jchromb.2008.10.048) PMID: [19010091](https://pubmed.ncbi.nlm.nih.gov/19010091/).
20. Coon JJ, Zürgbig P, Dakna M, Dominiczak AF, Decramer S, Fliser D, et al. CE-MS analysis of the human urinary proteome for biomarker discovery and disease diagnostics. *Proteomics Clin Appl.* 2008; 2(7–8): 964–973. PMID: [20130789](https://pubmed.ncbi.nlm.nih.gov/20130789/).
  21. Rossing K, Mischak H, Dakna M, Zürgbig P, Novak J, Julian BA, et al. Urinary proteomics in diabetes and CKD. *J Am Soc Nephrol.* 2008; 19(7): 1283–1290. doi: [10.1681/ASN.2007091025](https://doi.org/10.1681/ASN.2007091025) PMID: [18448586](https://pubmed.ncbi.nlm.nih.gov/18448586/).
  22. Benjamini Y, Hochberg Y. Controlling the false discovery rate: a practical and powerful approach to multiple testing. *J Royal Stat Soc B (Methodological).* 1995; 57: 125–133.
  23. Girolami M, Mischak H, Krebs R. Analysis of complex, multidimensional datasets. *Drug Discov Today Technol.* 2006; 3(1): 13–19. doi: [10.1016/j.ddtec.2006.03.010](https://doi.org/10.1016/j.ddtec.2006.03.010) PMID: [24980097](https://pubmed.ncbi.nlm.nih.gov/24980097/).
  24. R Development Core Team. R: A language and environment for statistical computing. Vienna, Austria: R Foundation for Statistical Computing. 2008
  25. Bosselmann H, Egstrup M, Rossing K, Gustafsson I, Gustafsson F, Tonder N, et al. Prognostic significance of cardiovascular biomarkers and renal dysfunction in outpatients with systolic heart failure: a long term follow-up study. *Int J Cardiol.* 2013; 170(2): 202–207. doi: [10.1016/j.ijcard.2013.10.064](https://doi.org/10.1016/j.ijcard.2013.10.064) PMID: [24182673](https://pubmed.ncbi.nlm.nih.gov/24182673/).
  26. Staessen J, Bulpitt CJ, Fagard R, Joossens JV, Lijnen P, Amery A. Familial aggregation of blood pressure, anthropometric characteristics and urinary excretion of sodium and potassium—a population study in two Belgian towns. *J Chronic Dis.* 1985; 38(5): 397–407. PMID: [3998054](https://pubmed.ncbi.nlm.nih.gov/3998054/).
  27. Kuznetsova T, Staessen JA, Kawecka-Jaszcz K, Babeanu S, Casiglia E, Filipovsky J, et al. Quality control of the blood pressure phenotype in the European Project on Genes in Hypertension. *Blood Press Monit.* 2002; 7(4): 215–224. PMID: [12198337](https://pubmed.ncbi.nlm.nih.gov/12198337/).
  28. Levey AS, Stevens LA, Schmid CH, Zhang Y, Castro AF III, Feldman HI, et al. for the CKD-EPI (Chronic Kidney Disease Epidemiology Collaboration) A new equation to estimate glomerular filtration rate. *Ann Intern Med.* 2009; 150(9): 604–612. PMID: [19414839](https://pubmed.ncbi.nlm.nih.gov/19414839/).
  29. Girolami M, Mischak H, Krebs R. Analysis of complex, multidimensional datasets. *Drug Discov Today Technol.* 2006; 3(1): 13–19. doi: [10.1016/j.ddtec.2006.03.010](https://doi.org/10.1016/j.ddtec.2006.03.010) PMID: [24980097](https://pubmed.ncbi.nlm.nih.gov/24980097/).
  30. Yang ZR. Biological applications of support vector machines. *Brief Bioinform.* 2004; 5(4): 328–338. PMID: [15606969](https://pubmed.ncbi.nlm.nih.gov/15606969/).
  31. Decramer S, Wittke S, Mischak H, Zurbig P, Walden M, Bouissou F, et al. Predicting the clinical outcome of congenital unilateral ureteropelvic junction obstruction in newborn by urinary proteome analysis. *Nat Med.* 2006; 12(4): 398–400. PMID: [16550189](https://pubmed.ncbi.nlm.nih.gov/16550189/).
  32. Theodorescu D, Fliser D, Wittke S, Mischak H, Krebs R, Walden M, et al. Pilot study of capillary electrophoresis coupled to mass spectrometry as a tool to define potential prostate cancer biomarkers in urine. *Electrophoresis.* 2005; 26(14): 2797–2808. PMID: [15981297](https://pubmed.ncbi.nlm.nih.gov/15981297/).
  33. Kuznetsova T, Mischak H, Mullen W, Staessen JA. Urinary proteome analysis in hypertensive patients with left ventricular diastolic dysfunction. *Eur Heart J.* 2012; 33(18): 2342–2350. doi: [10.1093/eurheartj/ehs185](https://doi.org/10.1093/eurheartj/ehs185) PMID: [22789915](https://pubmed.ncbi.nlm.nih.gov/22789915/).
  34. Good DM, Zürgbig P, Argiles A, Bauer HW, Behrens G, Coon JJ, et al. Naturally occurring human urinary peptides for use in diagnosis of chronic kidney disease. *Mol Cell Proteomics.* 2010; 9(11): 2424–2437. doi: [10.1074/mcp.M110.001917](https://doi.org/10.1074/mcp.M110.001917) PMID: [20616184](https://pubmed.ncbi.nlm.nih.gov/20616184/).
  35. Weber KT. Cardiac interstitium in health and disease: the fibrillar collagen network. *J Am Coll Cardiol.* 1989; 13(7): 1637–1652. PMID: [2656824](https://pubmed.ncbi.nlm.nih.gov/2656824/).
  36. Brilla CG, Zhou G, Rupp H, Maisch B, Weber KT. Role of angiotensin II and prostaglandin E2 in regulating cardiac fibroblast collagen turnover. *Am J Cardiol.* 1995; 76(13): 8D–13D. PMID: [7495221](https://pubmed.ncbi.nlm.nih.gov/7495221/).
  37. Weber KT. Extracellular matrix remodeling in heart failure: a role for de novo angiotensin II generation. *Circulation.* 1997; 96(11): 4065–4082. PMID: [9403633](https://pubmed.ncbi.nlm.nih.gov/9403633/).
  38. Toprak G, Yuksel H, Demirpence O, Islamoglu Y, Evliyaoglu O, Mete N. Fibrosis in heart failure subtypes. *Eur Rev Med Pharmacol Sci.* 2013; 17(17): 2302–2309. PMID: [24065222](https://pubmed.ncbi.nlm.nih.gov/24065222/).
  39. Lofsjogard J, Kahan T, Diez J, Lopez B, Gonzalez A, Edner M, et al. Biomarkers of collagen type I metabolism are related to B-type natriuretic peptide, left ventricular size, and diastolic function in heart failure. *J Cardiovasc Med (Hagerstown).* 2014; 15(6): 463–469. doi: [10.2459/01.JCM.0000435617.86180.0b](https://doi.org/10.2459/01.JCM.0000435617.86180.0b) PMID: [24983265](https://pubmed.ncbi.nlm.nih.gov/24983265/).
  40. Passino C, Barison A, Vergaro G, Gabutti A, Borrelli C, Emdin M, et al. Markers of fibrosis, inflammation, and remodeling pathways in heart failure. *Clin Chim Acta.* 2014; 443: 29–38. doi: [10.1016/j.cca.2014.09.006](https://doi.org/10.1016/j.cca.2014.09.006) PMID: [25218738](https://pubmed.ncbi.nlm.nih.gov/25218738/).

41. Barasch E, Gottdiener JS, Aurigemma G, Kitzman DW, Han J, Kop WJ, et al. The relationship between serum markers of collagen turnover and cardiovascular outcome in the elderly: the Cardiovascular Health Study. *Circ Heart Fail.* 2011; 4(6): 733–739. doi: [10.1161/CIRCHEARTFAILURE.111.962027](https://doi.org/10.1161/CIRCHEARTFAILURE.111.962027) PMID: [21900186](https://pubmed.ncbi.nlm.nih.gov/21900186/).
42. Barasch E, Gottdiener JS, Aurigemma G, Kitzman DW, Han J, Kop WJ, et al. Association between elevated fibrosis markers and heart failure in the elderly: the cardiovascular health study. *Circ Heart Fail.* 2009; 2(4): 303–310. doi: [10.1161/CIRCHEARTFAILURE.108.828343](https://doi.org/10.1161/CIRCHEARTFAILURE.108.828343) PMID: [19808353](https://pubmed.ncbi.nlm.nih.gov/19808353/).
43. Lubrano V, Papa A, Pingitore A, Cocci F. alpha-1 Protein evaluation to stratify heart failure patients. *J Cardiovasc Med (Hagerstown).* 2014; doi: [10.2459/JCM.000000000000016](https://doi.org/10.2459/JCM.000000000000016) PMID: [24911195](https://pubmed.ncbi.nlm.nih.gov/24911195/).
44. Valente MA, Voors AA, Damman K, van Veldhuisen DJ, Massie BM, O'Connor CM, et al. Diuretic response in acute heart failure: clinical characteristics and prognostic significance. *Eur Heart J.* 2014; 35(19): 1284–1293. doi: [10.1093/eurheartj/ehu065](https://doi.org/10.1093/eurheartj/ehu065) PMID: [24585267](https://pubmed.ncbi.nlm.nih.gov/24585267/).
